# Supplementary material
Source: publisher site journal article supplement (https://www.dovepress.com/article/344301)
Supplement: Supplementary file 1 [file get_supplementary_file.php]

**Appendix 1**

**Example scenario**

**Diagnosis:** Myocardial ischaemia secondary to coronary stent blockage

**Scenario:** admitted overnight with a 30 minute episode of central chest pain at rest that was similar to the pain they had with their previous heart attack but less severe. Previous NSTEMI a few years ago with stents inserted. No further chest pain overnight but an initially raised troponin needs a repeat.

**Ward round consequences:** During SIMULATION 1, it will be handed over that there is 12hr troponin result to chase (the high sensitivity troponin machine is broken) however the result won’t be ready until SIMULATION 2. During SIMULATION 2 the students will receive a bleep from the lab to say that the troponin result has come back higher than the previous troponin which indicate there is a problem with one of the coronary stents. This will generate need to refer to cardiology urgently and explain result and review the patient (who will have some questions).

**Student jobs:**

- Receive troponin result from labs
- Review patients symptoms
- Contact a senior and/or directly contact cardiology urgently to make transfer to cath lab
- Need to explain result to patient and answer questions
